# Supplementary material
Source: PubMed Central journal article supplement (PMC7135995)
Supplement: supp_RA119.012015_157288_1_supp_463124_q4ft7q.pdf [file supp_RA119.012015_157288_1_supp_463124_q4ft7q.pdf]

## SUPPORTING INFORMATION

*In-vivo* crystals reveal critical features of the interaction between CFTR and the PDZ2 domain of Na<sup>+</sup>/H<sup>+</sup> exchange cofactor NHERF1

**Eleanor R. Martin<sup>1,2#</sup>, Alessandro Barbieri<sup>1,3</sup>, Robert C. Ford<sup>1</sup>, Robert C. Robinson<sup>2,4,5\*</sup>**

From the <sup>1</sup>School of Biology, Faculty of Biology Medicine and Health, Michael Smith Building, The University of Manchester, Oxford Road, Manchester, M13 9PL, UK; <sup>2</sup>Institute of Molecular and Cell Biology, A\*STAR (Agency for Science, Technology and Research), Biopolis, 138673, Singapore; <sup>3</sup>Bioinformatics Institute (BII), A\*STAR (Agency for Science, Technology and Research), Biopolis, 138671, Singapore; <sup>4</sup>Vidyasirimedhi Institute of Science and Technology (VISTEC), Rayong, 21210, Thailand; <sup>5</sup>Research Institute for Interdisciplinary Science, Okayama University, Okayama, 700-8530, Japan

<sup>#</sup>Present address: Luxembourg Institute of Health, 1A-B, rue Thomas Edison, L-1445, Luxembourg

### Supporting information

Figure S1: Overlay of the structures of the extended and canonical NHERF1 PDZ2 domains

Figure S2: Secondary structure prediction for the PDZ domains of the NHERF family

Figure S3: Cross-species sequence alignment of the CFTR C-terminus

Figure S4: *In-cellulo* crystals formed by the iBox-PDZ2-PAK4cat fusion construct

Figure S5: Unrefined electron density map obtained for the iBox-PDZ2-PAK4cat fusion construct

Figure S6: Light images of COS-7 cells co-transfected with GFP-PDZ1 and either iBox-PAK4cat-DTRL or iBox-PAK4cat-AAAA

Figure S7: Representative GFP fluorescent images of COS-7 cells co transfected with GFP-PDZ and iBox-PAK4cat-DTRL construct variants

Figure S8: Corresponding light images for Figure S7

Figure S9: GFP fluorescent image of crystals obtained from lysed cells following co-transfection with GFP-PDZ1 and iBox-PAK4cat-DTRL

Figure S10: Root-mean-square-deviation (RMSD) of NHERF1 PDZ2 in complex with the CFTR PDZ-binding motif with different protonation states for H169 and H212

Figure S11: Root-mean-square-deviation (RMSD) of NHERF1 PDZ2 in complex with the CFTR PDZ-binding motif alanine substitution mutants

Table S1: Diffraction statistics for the iBox-PDZ2-PAK4cat fusion crystal

Movie S1: Fluorescent time-lapse comparison of COS-7 cells co transfected with GFP-PDZ2 and iBox-PAK4cat constructs

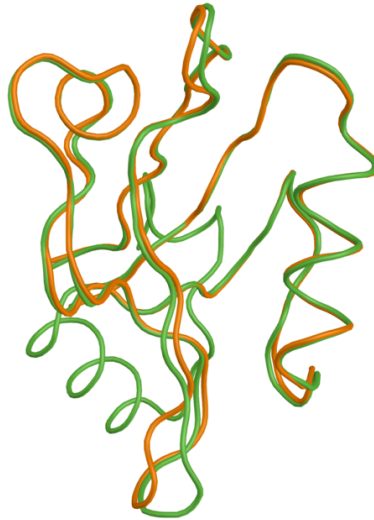

**Figure S1. Overlay of extended and canonical NHERF1 PDZ2 domain.** Extended PDZ2 domain of NHERF1 obtained in this study (green) is overlaid with the crystal structure of the canonical domain (PDB: 2OZF) (orange).

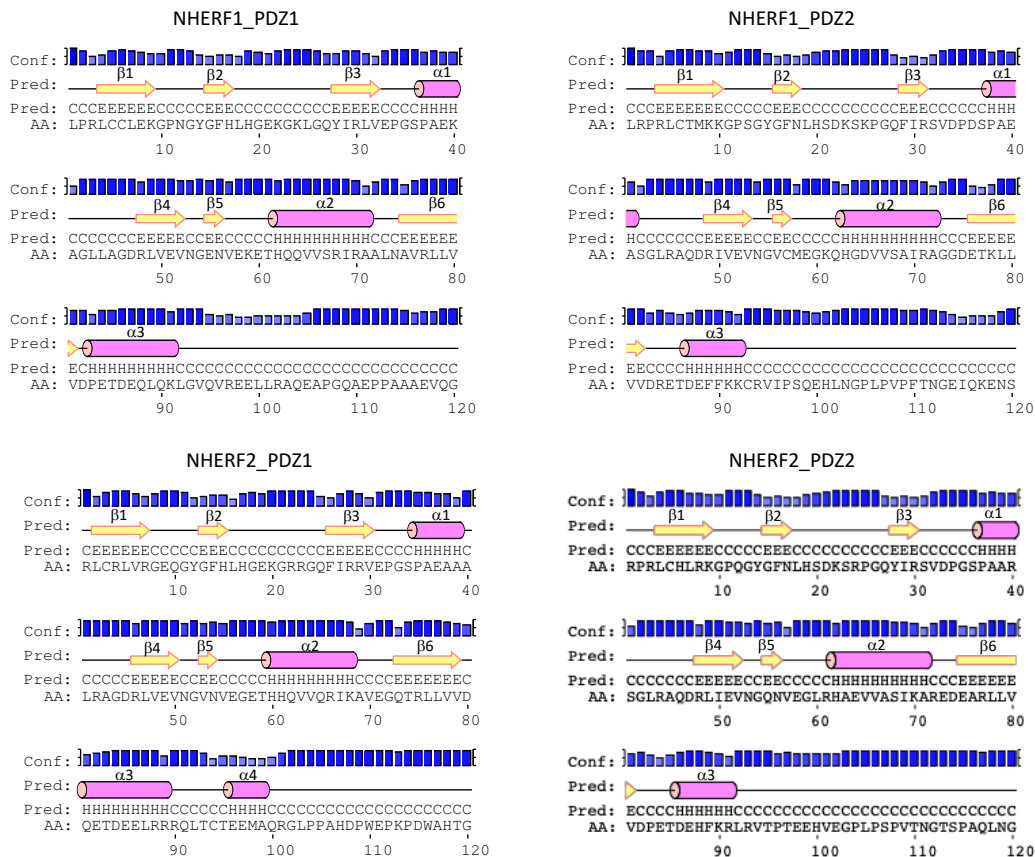

NHERF3\_PDZ1

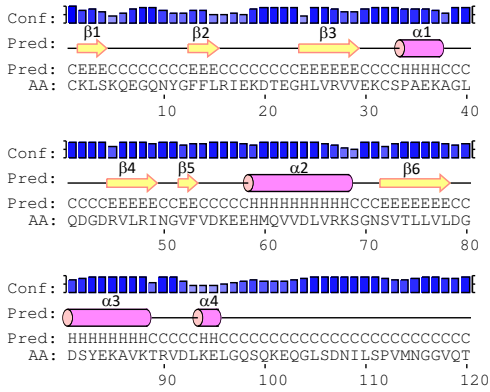

NHERF3\_PDZ2

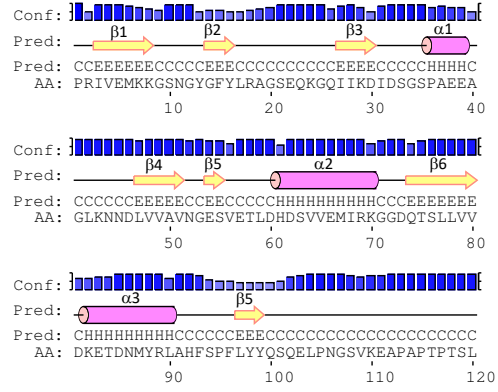

NHERF3\_PDZ3

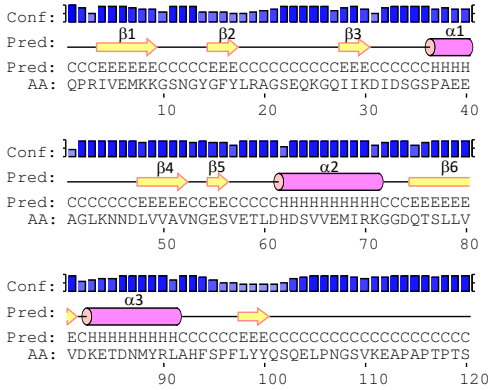

NHERF3\_PDZ4

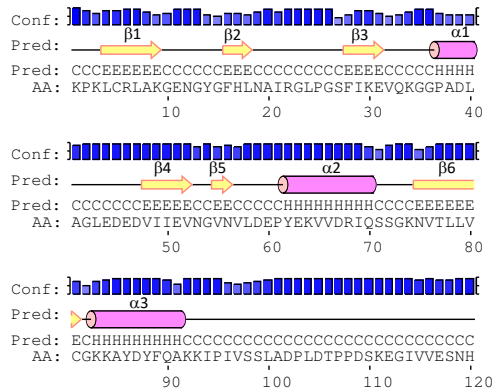

NHERF4\_PDZ1

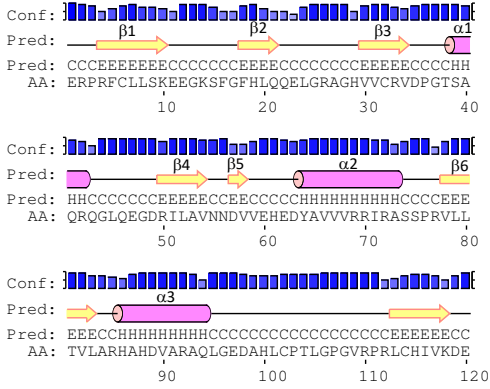

NHERF4\_PDZ2

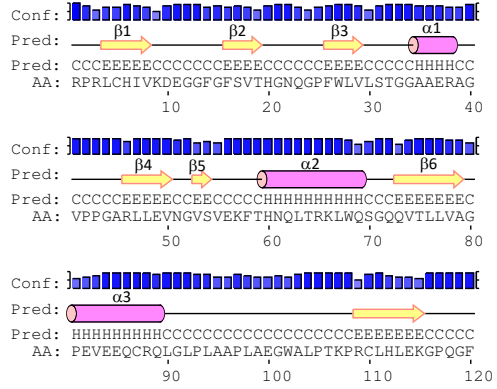

CAL1

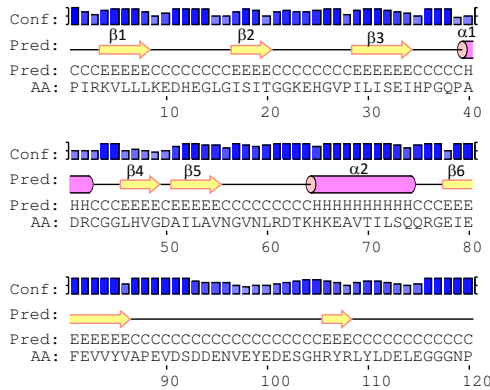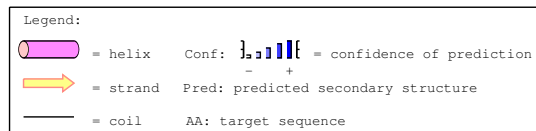



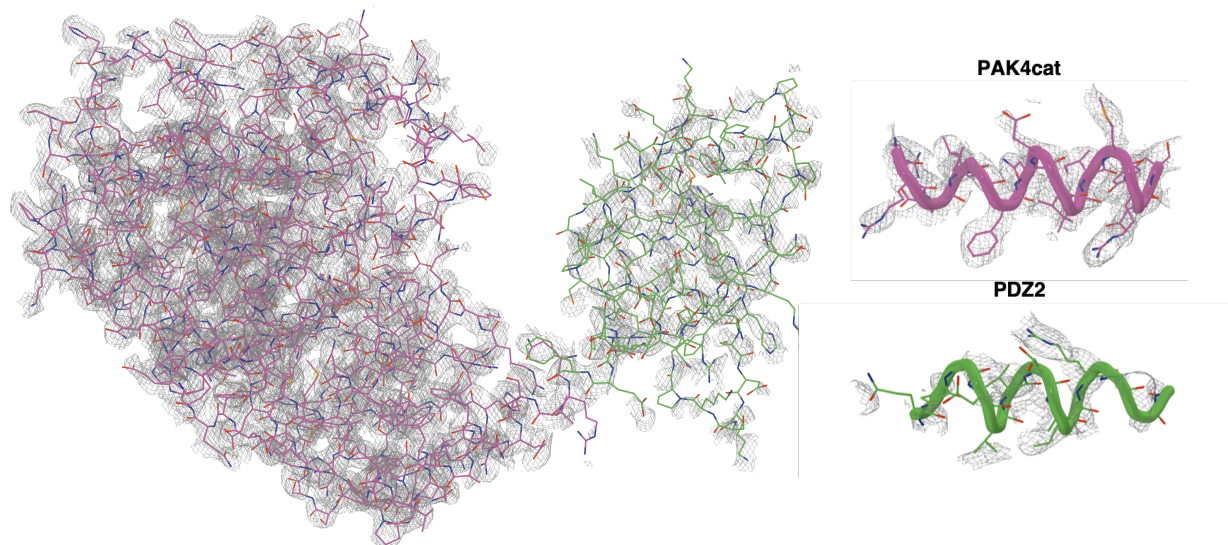

**Figure S5. Unrefined electron density map obtained for the iBox-PDZ2-PAK4cat fusion construct.** OMIT mesh map is contoured at 1.0 sigma and within 1.5 Å of the respective atoms. Left, iBox-PAK4cat is shown in magenta and PDZ2 in green. Right, comparison of electron density observed for typical helices in PAK4cat and PDZ.

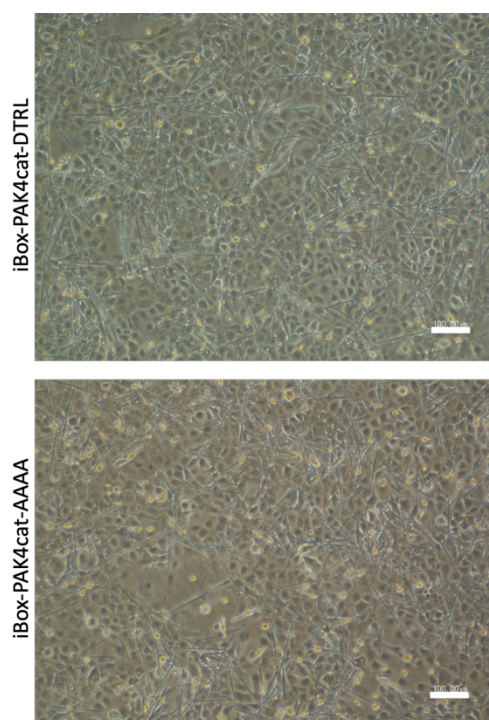

**Figure S6. Light images of COS-7 cells co-transfected with GFP-PDZ1 and either iBox-PAK4cat-DTRL or iBox-PAK4cat-AAAA.** Both iBox-PAK4cat construct variants appear to be similar in terms of crystal generation proficiency. Scale bar indicates 100 µm.

**GFP-PDZ1**

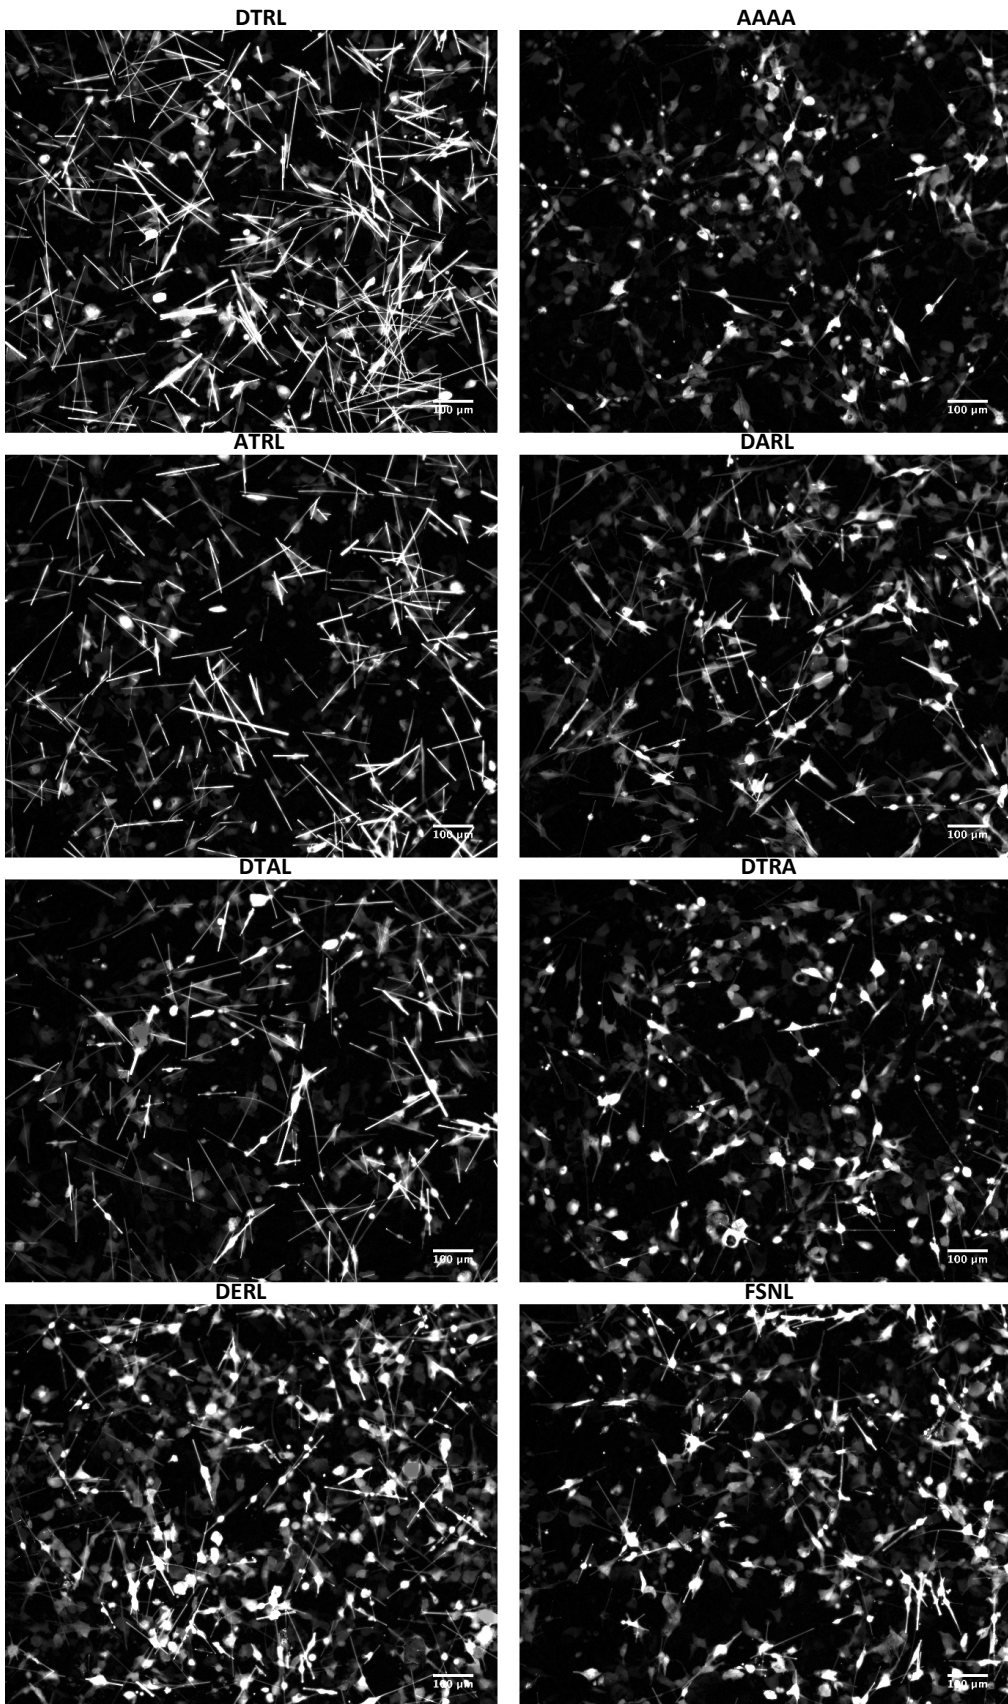

## GFP-PDZ2

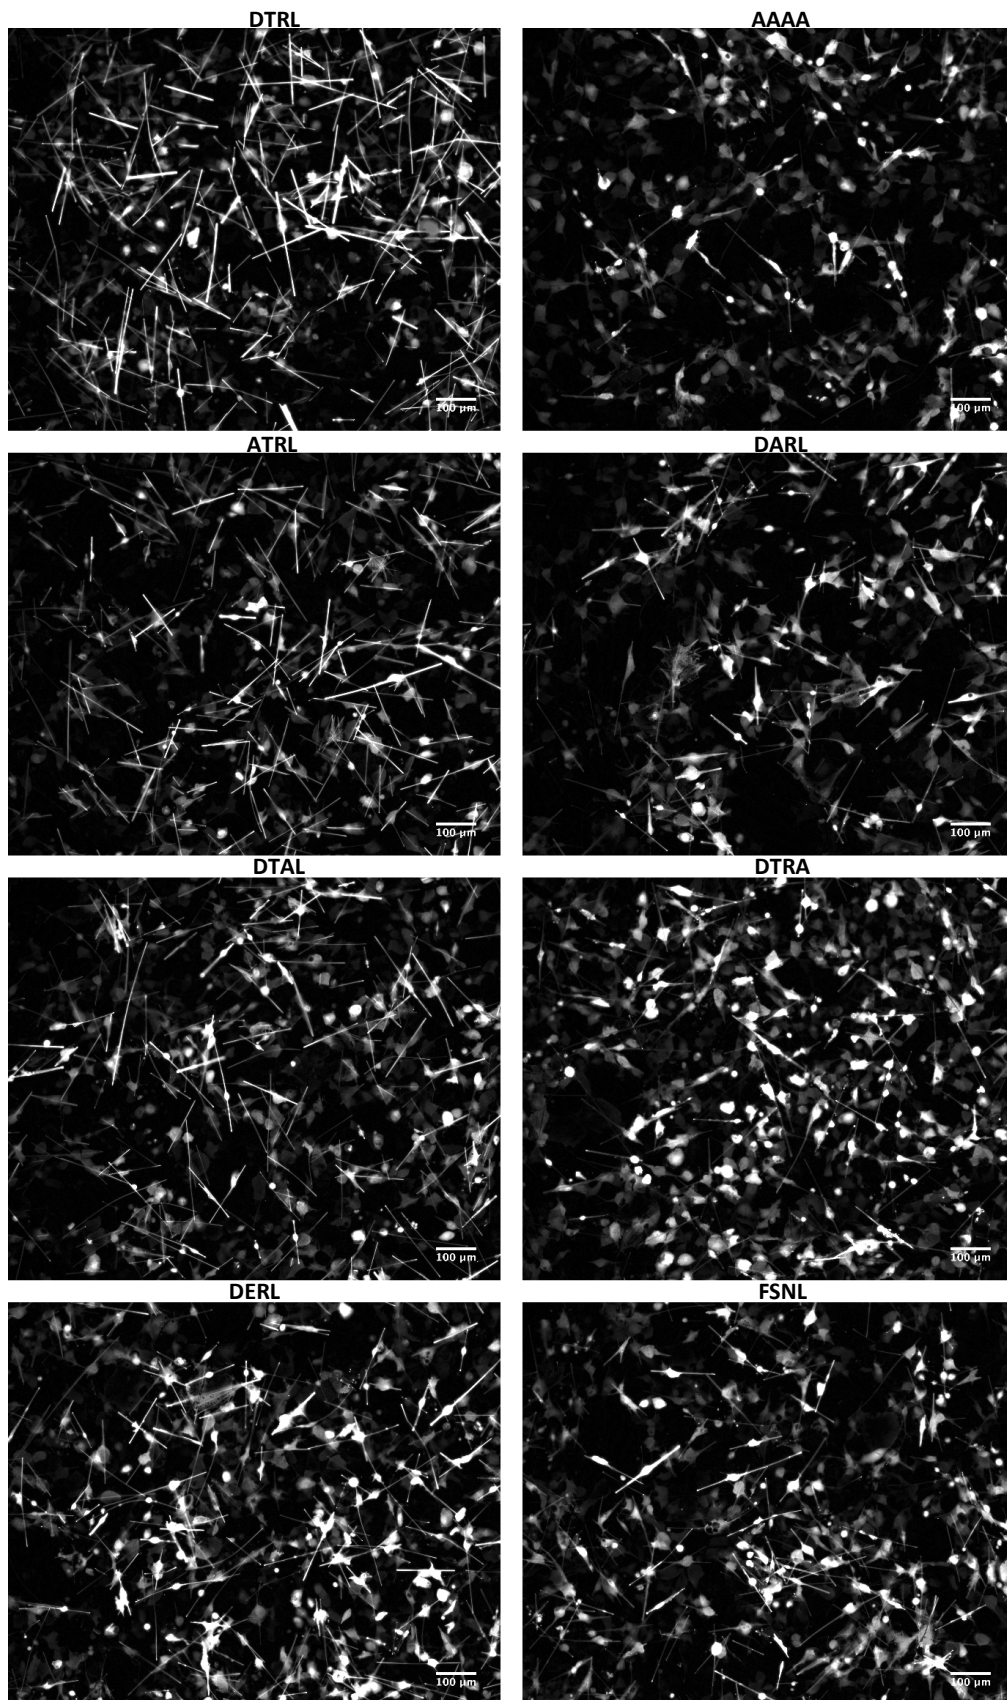

**Figure S7. Representative GFP fluorescent images of COS-7 cells co-transfected with GFP-PDZ2 and iBox-PAKcat4-DTRL construct variants. Please note: Images for GFP-PDZ2 with iBox-**

PAK4cat-DTRL and GFP-PDZ2 with iBox-PAK4cat-DTRA co-transfections have been reproduced from Fig. 5B.

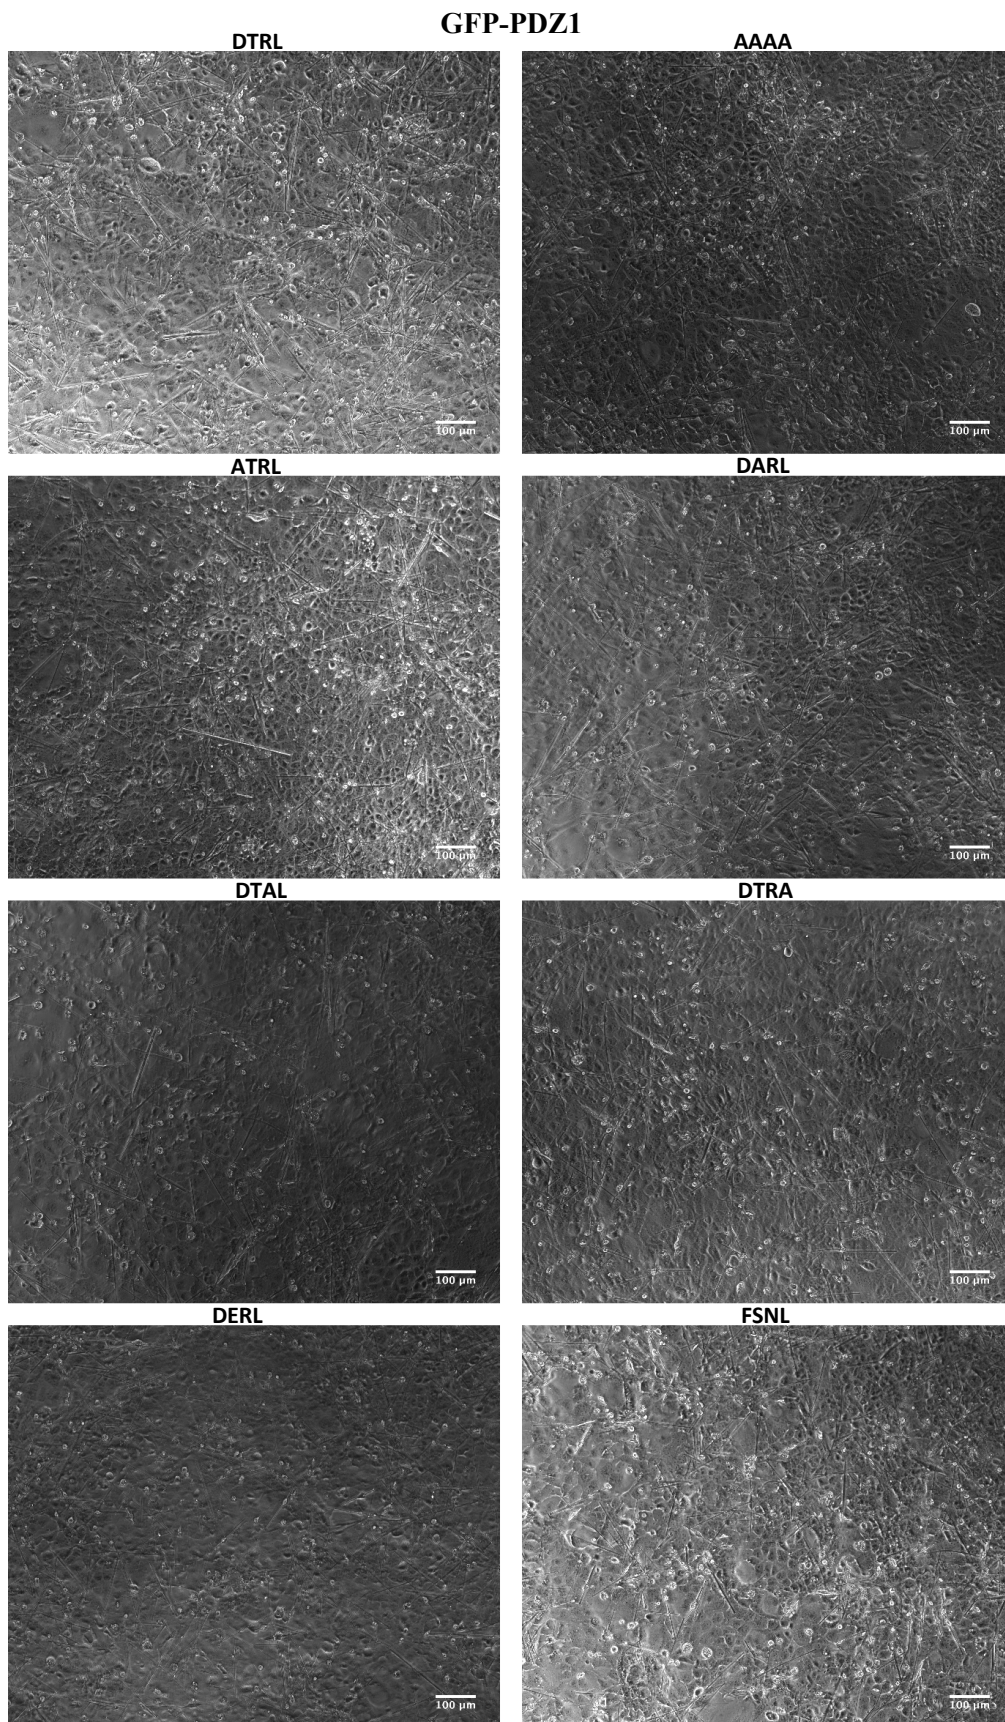



**GFP-PDZ2**

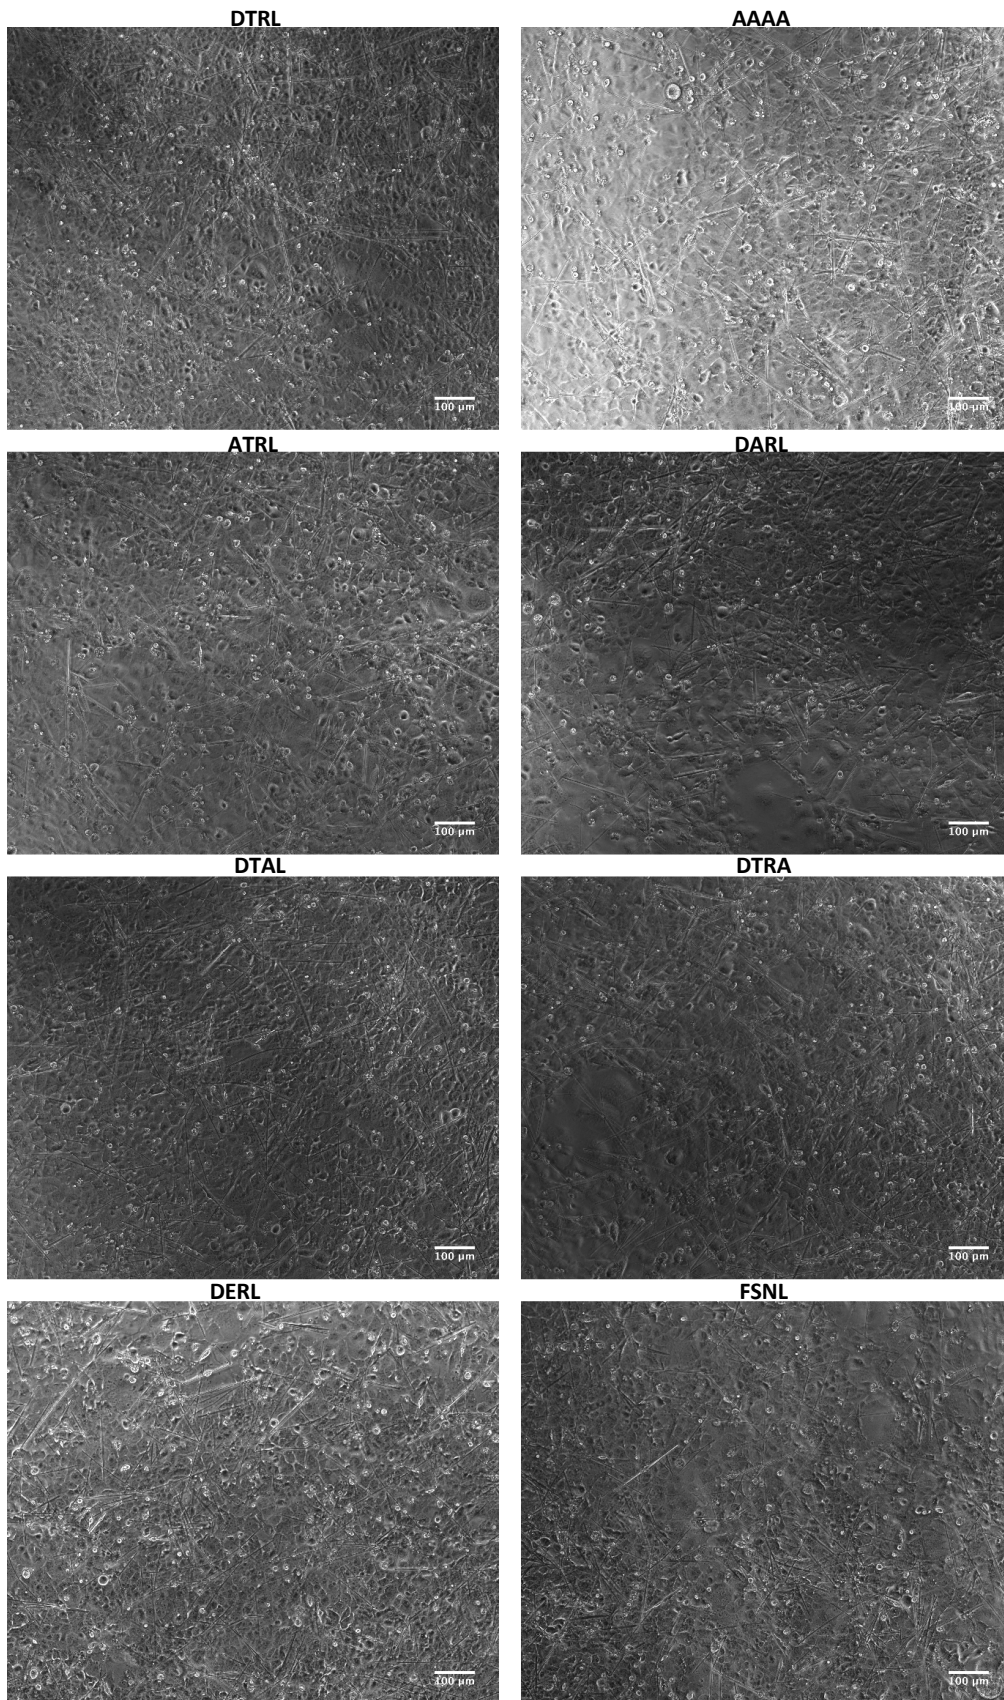

**Figure S8. Corresponding light images for Figure S7.**

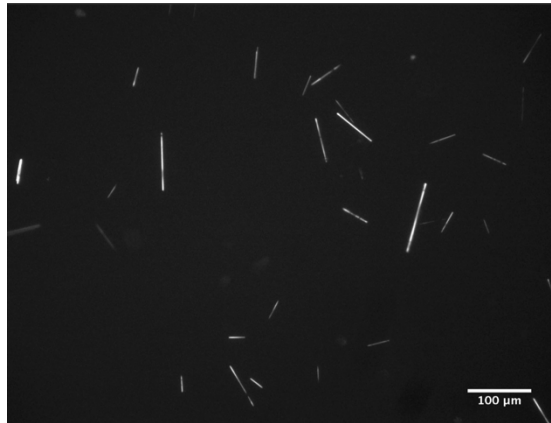

**Figure S9. GFP fluorescent image of crystals obtained from lysed cells following co-transfection with GFP-PDZ1 and iBox-PAK4cat-DTRL.**

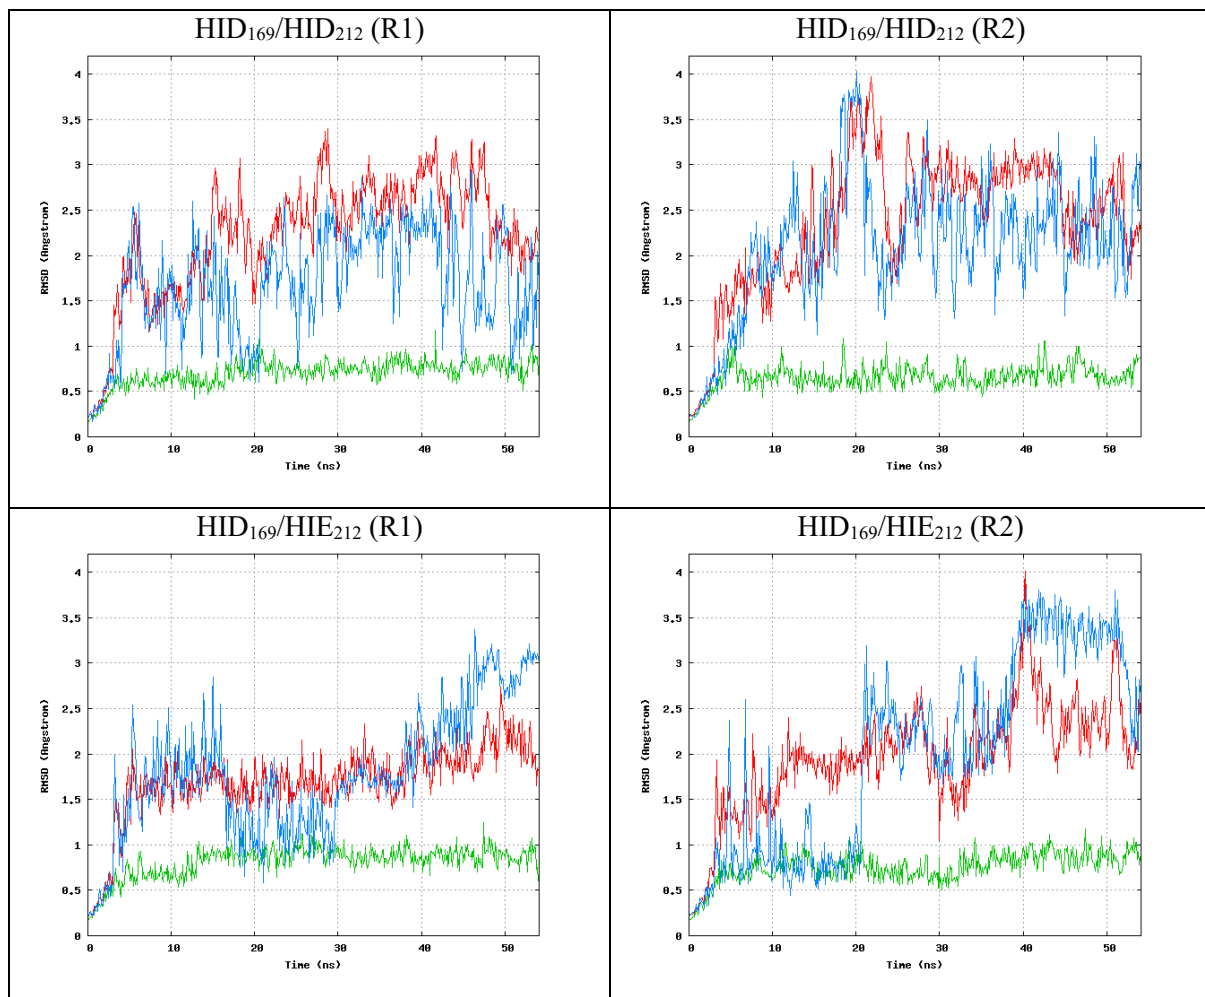

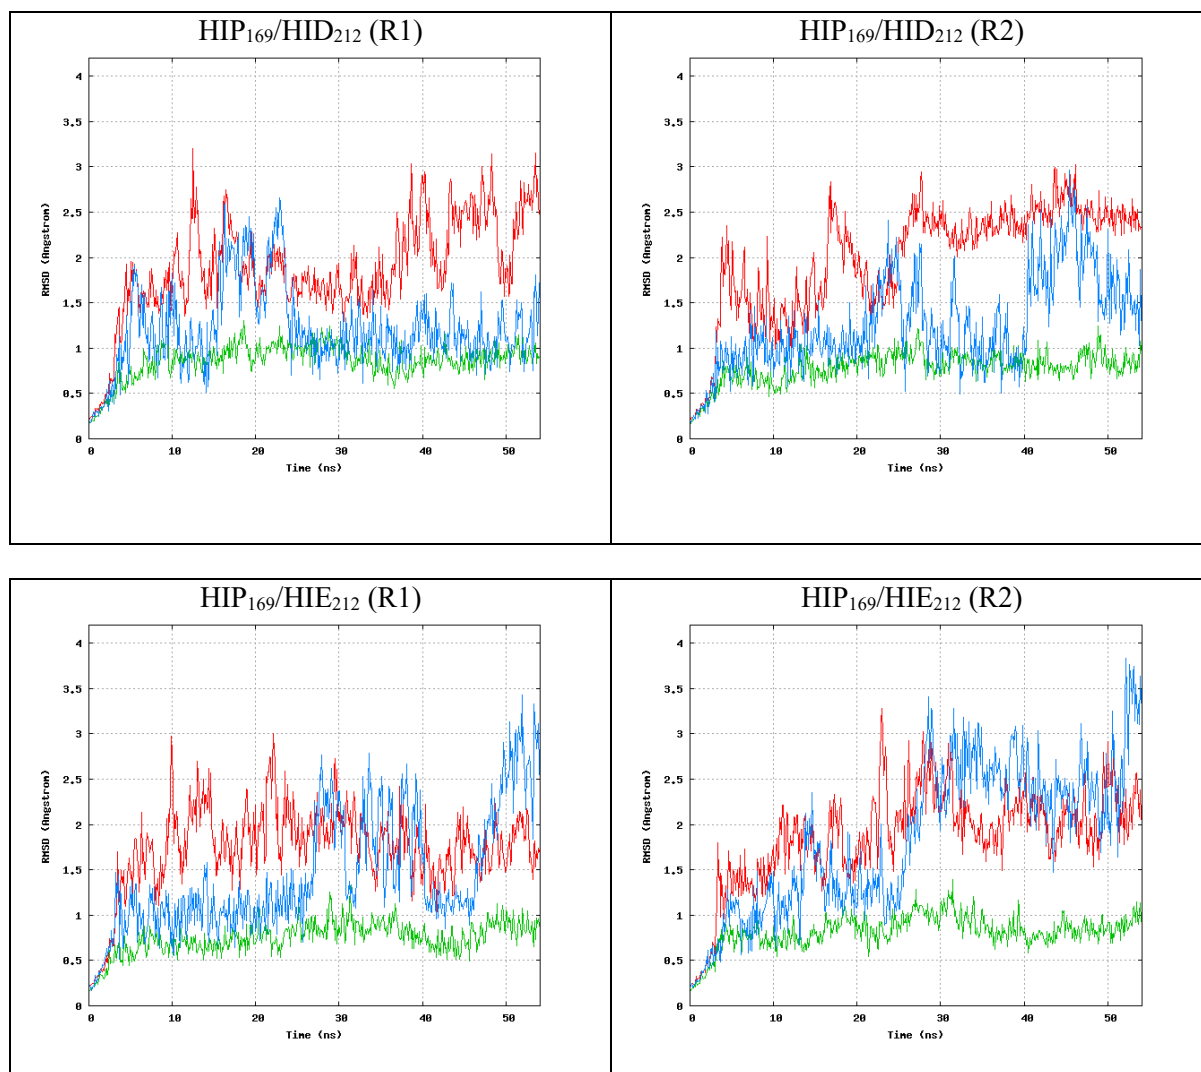

**Figure S10. Root-mean-square-deviation (RMSD) of NHERF1 PDZ2 in complex with the CFTR PDZ-binding motif with different protonation states for H169 and H212.** HIP (+1 charged, both  $\delta$ - and  $\epsilon$ -nitrogens protonated), HID (neutral,  $\delta$ -nitrogen protonated), and HIE (neutral,  $\epsilon$ -nitrogen protonated). R = replicate. RMSD for all C $\alpha$  atoms is shown in red, the RMSD related to C $\alpha$  atoms of the secondary structure elements of the complex is shown in green, and the RMSD of C $\alpha$  atoms of the peptide is shown in blue.

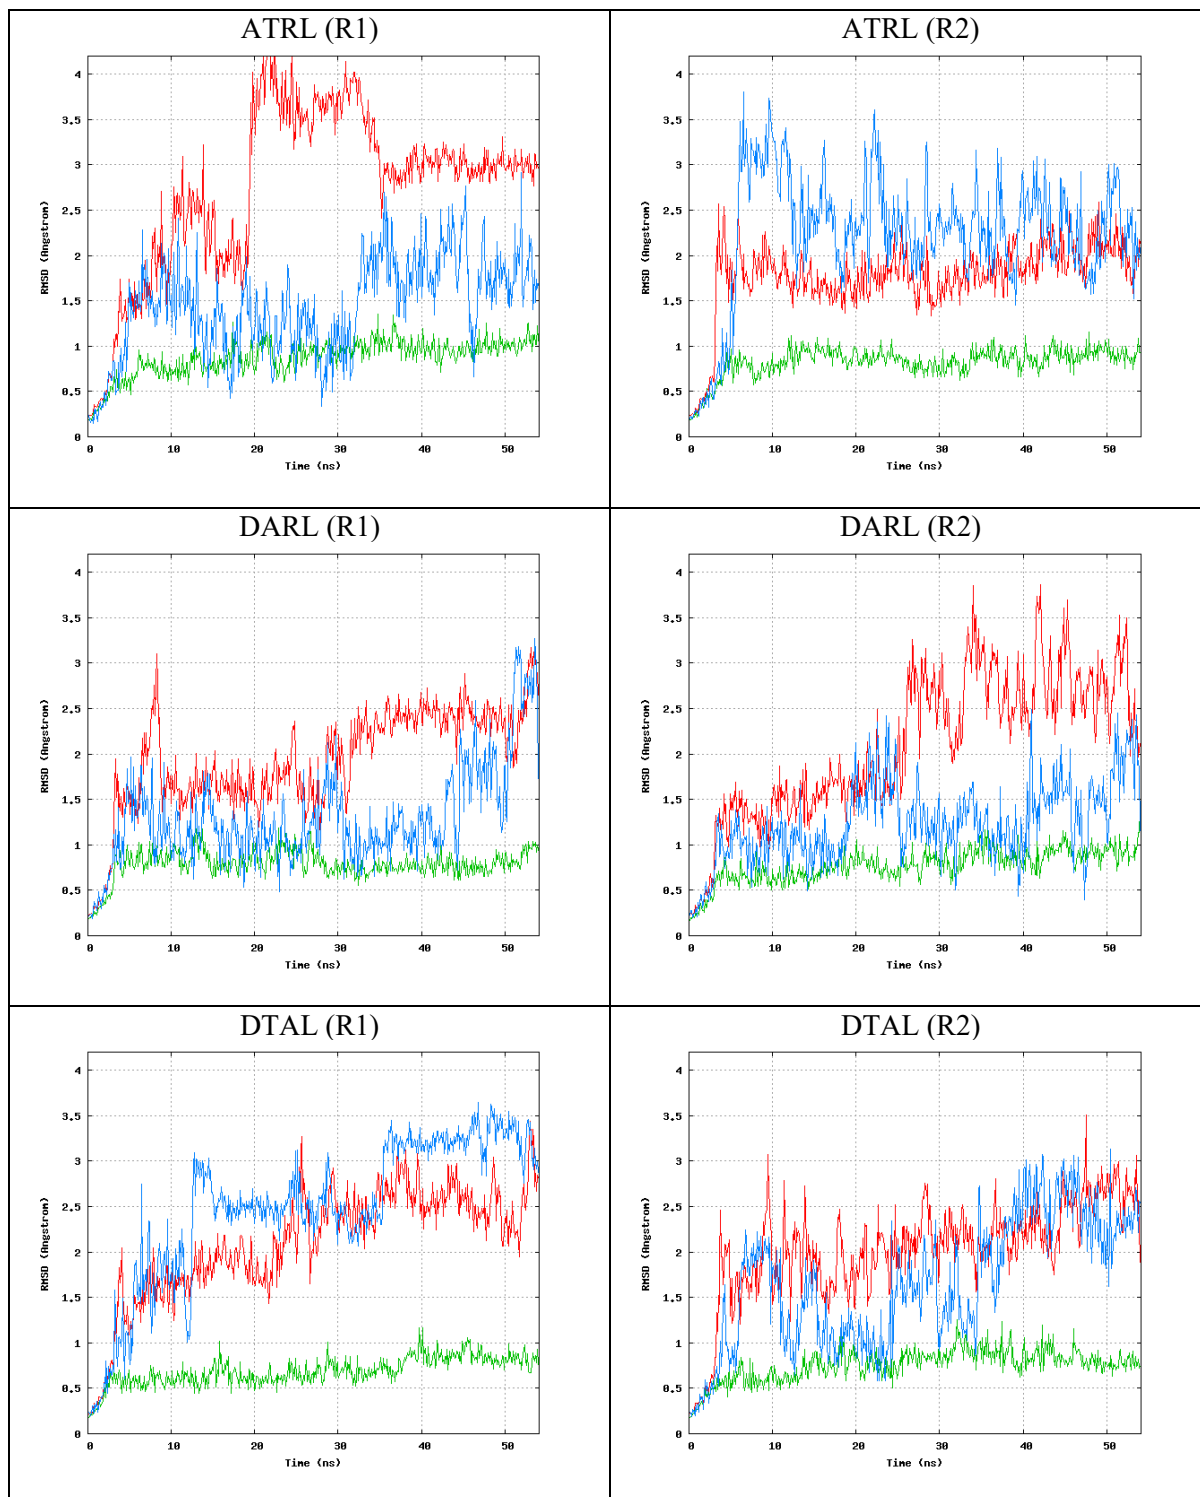

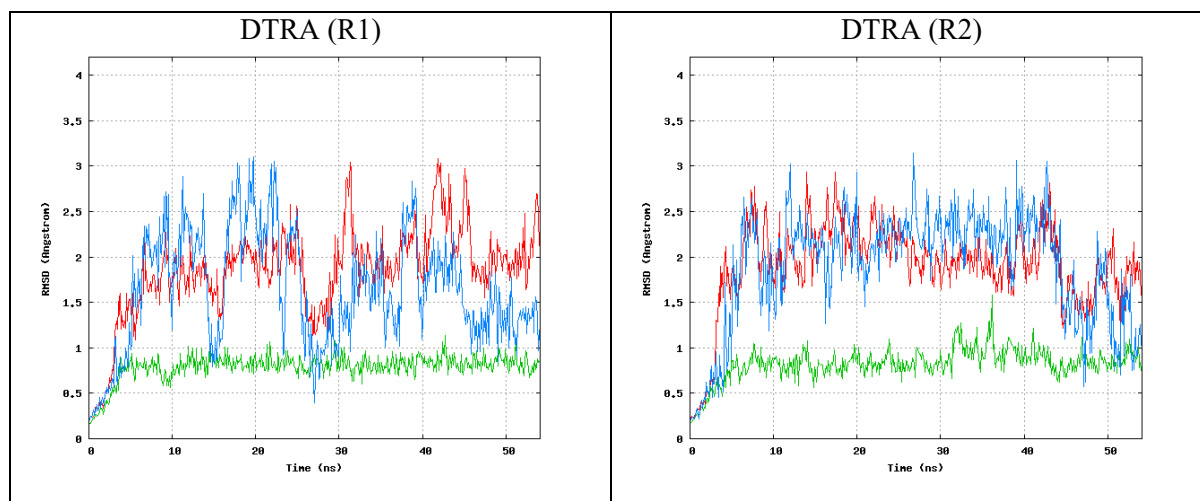

**Figure S11. Root-mean-square-deviation (RMSD) of NHERF1 PDZ2 in complex with the CFTR PDZ-binding motif alanine substitution mutants.** R = replicate. RMSD for all C $\alpha$  atoms is shown in red, the RMSD related to C $\alpha$  atoms of the secondary structure elements of the complex is shown in green, and the RMSD of C $\alpha$  atoms of the peptide is shown in blue.

|                                       |                       |
|---------------------------------------|-----------------------|
| <b>Space group</b>                    | P6 <sub>3</sub>       |
| <b>Cell dimensions</b>                |                       |
| (a, b, c) (Å)                         | 143.1, 143.1, 61.8    |
| ( $\alpha$ , $\beta$ , $\gamma$ ) (°) | 90.0, 90.0, 120.0     |
| <b>Resolution range (Å)</b>           | 19.9-3.15 (3.21-3.15) |
| <b>Unique reflections</b>             | 13276 (633)           |
| <b>Completeness (%)</b>               | 99.9 (99.4)           |
| <b>Multiplicity</b>                   | 3.6 (3.1)             |
| <b>R<sub>merge</sub></b>              | 18.8 (57.6)           |
| <b>I/<math>\sigma</math></b>          | 6.3 (2.0)             |

**Table S1. Diffraction statistics for the iBox-PDZ2-PAK4cat fusion crystal.**

**Movie S1. Fluorescent time-lapse comparison of COS-7 cells co-transfected with GFP-PDZ2 and iBox-PAK4cat constructs.** iBox-PAK4cat-DTRL, left, or iBox-PAK4catDTRA, right.
